# Supplementary material
Source: PubMed Central journal article supplement (PMC3422818)
Supplement: amiajnl-2011-000433-s2.pdf [file amiajnl-2011-000433-s2.pdf]

## APPENDICES

Table A. Detailed Response Information for Study Cohort

| Item                                                       | Waitlist    | PCHMS       | Total       |
|------------------------------------------------------------|-------------|-------------|-------------|
| No. completed pre-study survey & registered for study      | 372         | 370         | 742         |
|                                                            | n=372 (%)   | n=370 (%)   | n=742 (%)   |
| No. completed post-study survey                            | 310 (82.0%) | 294 (67.8%) | 604 (81.4%) |
| No. of participants completed monthly surveys (maximum 5): |             |             |             |
| - 0 survey                                                 | 28 (7.5%)   | 70 (18.9%)  | 98 (13.2%)  |
| - 1 survey                                                 | 19 (5.1%)   | 33 (8.9%)   | 52 (7.0%)   |
| - 2 surveys                                                | 24 (6.5%)   | 21 (5.7%)   | 45 (6.1%)   |
| - 3 surveys                                                | 31 (8.3%)   | 25 (6.8%)   | 56 (7.5%)   |
| - 4 surveys                                                | 100 (26.9%) | 85 (23.0%)  | 185 (24.9%) |
| - 5 surveys                                                | 170 (45.7%) | 136 (36.8%) | 306 (41.2%) |
| Mean (SD) of monthly follow-up surveys completed           | 3.8 (1.56)  | 3.2 (1.95)  | 3.5 (1.79)  |
| No. (%) who completed at least 1 monthly follow-up survey  | 344 (92.5%) | 300 (81.1%) | 644 (86.8%) |

Table B. ILI symptoms and impact by study group during RCT<sup>a</sup>

|                                                       | Waitlist<br>n=344 (%) | PCHMS<br>n=300 (%) | Total<br>n=644 (%) | P-value |
|-------------------------------------------------------|-----------------------|--------------------|--------------------|---------|
| <i>Symptoms</i>                                       |                       |                    |                    |         |
| Fever-like                                            | 132 (38.4%)           | 108 (36.0%)        | 240 (37.3%)        | .535    |
| Coughs or a sore throat                               | 255 (74.1%)           | 216 (72.0%)        | 471 (73.1%)        | .543    |
| Vomiting or diarrhoea                                 | 107 (31.1%)           | 76 (25.3%)         | 183 (28.4%)        | .105    |
| At least one symptom                                  | 280 (81.4%)           | 240 (80.0%)        | 520 (80.7%)        | .654    |
| <i>Influenza-like illness (ILI)</i>                   |                       |                    |                    |         |
| ILI (i.e. fever/fever-like and coughs or sore throat) | 89 (25.9%)            | 85 (28.3%)         | 174 (27.0%)        | .483    |
| <i>Impact of ILI symptoms</i>                         |                       |                    |                    |         |
| Experienced performance impairment                    | 179(52.0%)            | 154(51.3%)         | 333 (51.7%)        | .859    |
| Absent from normal duties                             | 265 (77.0%)           | 234 (78.0%)        | 499 (77.5%)        | .770    |
| Visited a healthcare professional                     | 94 (27.3%)            | 83 (27.7%)         | 177 (27.5%)        | .923    |
| Used medication or remedy                             | 213 (61.9%)           | 176 (58.7%)        | 389 (60.4%)        | .400    |

<sup>a</sup> Data is number of participant, who completed at least 1 follow-up survey and reported this symptom (or activity) at least once during the study.

Table C. Health activities by study group during RCT<sup>a</sup>

|                                                     | <b>Waitlist<sup>b</sup></b><br>n=246 (%) | <b>PCHMS<sup>b</sup></b><br>n=224 (%) | <b>% difference</b> | <b>P-value</b> |
|-----------------------------------------------------|------------------------------------------|---------------------------------------|---------------------|----------------|
| Received influenza vaccine <sup>c</sup>             | 12 (4.9%)                                | 26 (11.6%)                            | 6.7%                | .008           |
| Visited University Health Service <sup>f</sup>      | 44 (17.9%)                               | 66 (29.5%)                            | 11.6%               | .003           |
|                                                     | <b>Waitlist<sup>c</sup></b><br>n=71 (%)  | <b>PCHMS<sup>c</sup></b><br>n=74 (%)  | <b>% difference</b> | <b>P-value</b> |
| Existing patients visited University Health Service | 32 (45.1%)                               | 49 (66.2%)                            | 21.1%               | .010           |
|                                                     | <b>Waitlist<sup>d</sup></b><br>n=175 (%) | <b>PCHMS<sup>d</sup></b><br>n=150 (%) | <b>% difference</b> | <b>P-value</b> |
| New patients visited University Health Service      | 12 (6.9%)                                | 17 (11.3%)                            | 4.4%                | .158           |

<sup>a</sup> Data is number of participant.<sup>b</sup> Participants eligible for primary analysis.<sup>c</sup> Participants eligible for primary analysis who are existing patients at UHS prior to study.<sup>d</sup> Participants eligible for primary analysis who have not visited UHS prior to study.<sup>e</sup> Clinical audits conducted at the UHS with exact matches on surname, date of birth, and an approximate match on first-name confirmed that at least 61.1% (11/18) of participants received Panvax®, Fluvax®, Intanza® or Vaxigrip® between 8 May 2010 and 22 October 2010.<sup>f</sup> Clinical audits conducted at the UHS with exact matches on surname, date of birth and an approximate match on first-name confirmed that at least 59.1% (65/110) of participants conducted these visits between 8 May 2010 and 22 October 2010.

Table D. Logistic regression predicting likelihood of receiving influenza vaccine during study (after controlling for baseline characteristics and factors collected at post-study)

|                                   | <b>B</b> | <b>S.E.</b> | <b>Wald</b> | <b>df</b> | <b>P-value</b> | <b>Adjusted Odds ratio</b> | <b>95.0% CI for Adjusted Odds Ratio</b> |              |
|-----------------------------------|----------|-------------|-------------|-----------|----------------|----------------------------|-----------------------------------------|--------------|
|                                   |          |             |             |           |                |                            | <b>Lower</b>                            | <b>Upper</b> |
| Past history of influenza vaccine | 1.915    | .364        | 27.628      | 1         | <.001          | 6.787                      | 3.323                                   | 13.861       |
| Allocation to PCHMS               | .743     | .379        | 3.844       | 1         | .050           | 2.102                      | 1.000                                   | 4.416        |
| Age                               | .034     | .017        | 4.166       | 1         | .041           | 1.035                      | 1.001                                   | 1.070        |

Table E. Health activities according to frequency of accessing PCHMS (n=345) <sup>a</sup>

|                                                               | <b><i>Frequency of accessing PCHMS</i></b> |                                                |                     |                |
|---------------------------------------------------------------|--------------------------------------------|------------------------------------------------|---------------------|----------------|
|                                                               | <b>Once only <sup>b</sup></b><br>n=130 (%) | <b>More than once <sup>b</sup></b><br>n=54 (%) | <b>% difference</b> | <b>P-value</b> |
| Received influenza vaccine during study                       | 11 (8.5%)                                  | 15 (27.8%)                                     | 19.3%               | .001           |
| Visited University Health Service during study                | 31 (23.8%)                                 | 25 (46.3%)                                     | 22.5%               | .003           |
|                                                               | <b>Once only <sup>c</sup></b><br>n=248 (%) | <b>More than once <sup>c</sup></b><br>n=97 (%) | <b>% difference</b> | <b>P-value</b> |
| Used PCHMS for adding/updating/deleting of health data        | 41 (16.5%)                                 | 59 (60.8%)                                     | 44.3%               | <.001          |
| Used PCHMS to book appointment with University Health Service | 3 (1.2%)                                   | 29 (29.9%)                                     | 28.7%               | <.001          |
|                                                               | <b>Once only <sup>d</sup></b><br>n=38 (%)  | <b>More than once <sup>d</sup></b><br>n=24 (%) | <b>% difference</b> | <b>P-value</b> |
| Existing patients visited University Health Service           | 23 (60.5%)                                 | 16 (66.7%)                                     | 6.2%                | .626           |
|                                                               | <b>Once only <sup>e</sup></b><br>n=92 (%)  | <b>More than once <sup>e</sup></b><br>n=30 (%) | <b>% difference</b> | <b>P-value</b> |
| New patients visited University Health Service                | 8 (8.7%)                                   | 9 (30.0%)                                      | 21.3%               | .003           |

<sup>a</sup> Data is number of participant.

<sup>b</sup> Participants eligible for primary analysis, and have accessed PCHMS.

<sup>c</sup> Participants who have accessed PCHMS.

<sup>d</sup> Participants eligible for primary analysis who are existing patients at UHS before study, and have accessed PCHMS.

<sup>e</sup> Participants eligible for primary analysis who were not patients at UHS before study, and have accessed PCHMS.

Table F. Reasons given by participants for *visiting* UNSW CAPS during study (n=38)<sup>a</sup>

|                                                                                                                                           | Past history–Post-study status of influenza vaccination |                     |                   |         |
|-------------------------------------------------------------------------------------------------------------------------------------------|---------------------------------------------------------|---------------------|-------------------|---------|
|                                                                                                                                           | No-Yes<br>n=14 (%)                                      | Yes-Yes<br>n=24 (%) | Total<br>n=38 (%) | P-value |
| <b>All reasons cited<sup>b</sup></b>                                                                                                      |                                                         |                     |                   |         |
| PCHMS made the process easier / reminded me to take an influenza vaccine [only applicable to those who had immediate access to PCHMS] [S] | 8 (57.1%)                                               | 4 (16.7%)           | 12 (31.6%)        | .014    |
| May catch influenza (or give to others) / Others around me were getting ill [K]                                                           | 1 (7.1%)                                                | 14 (58.3%)          | 15 (39.5%)        | .002    |
| Don't want to get sick [K]                                                                                                                | 6 (42.9%)                                               | 17 (70.8%)          | 23 (60.5%)        | .089    |
| Don't want to experience impairment to work, study or my daily activities [K]                                                             | 3 (21.4%)                                               | 12 (50.0%)          | 15 (39.5%)        | .101    |
| Encouraged / influenced by others around me (e.g. family, friends, workplace, healthcare provider) [S]                                    | 3 (21.4%)                                               | 11 (45.8%)          | 14 (36.8%)        | .175    |
| Past successful protection / vaccine is effective / past influenza when unvaccinated                                                      | 3 (21.4%)                                               | 11 (45.8%)          | 14 (36.8%)        | .175    |
| Free vaccine [S]                                                                                                                          | 5 (35.7%)                                               | 8 (33.3%)           | 13 (46.4%)        | .881    |
| Convenient [S]                                                                                                                            | 3 (21.4%)                                               | 4 (16.7%)           | 7 (18.4%)         | 1.000   |
| Other (e.g. medical condition, overseas travel)                                                                                           | 0                                                       | 6 (25.0%)           | 6 (15.8%)         | N/A     |

<sup>a</sup> Data is number of participant. Participants can select more than one reason.<sup>b</sup> [S] refers to system-related factor and [K] refers to knowledge/belief-related factor.Table G. Reasons given by participants for *not receiving* influenza vaccine (n=432)<sup>a</sup>

|                                                                           | Past history–Post-study status of influenza vaccination |                |                    |         |
|---------------------------------------------------------------------------|---------------------------------------------------------|----------------|--------------------|---------|
|                                                                           | No-No<br>n=351                                          | Yes-No<br>n=81 | Total<br>n=432 (%) | P-value |
| <b>All reasons cited<sup>b</sup></b>                                      |                                                         |                |                    |         |
| Avoid vaccines / medications [K]                                          | 58 (16.5%)                                              | 3 (3.7%)       | 61 (14.1%)         | .001    |
| I had difficulty organising a visit to get the vaccine [S]                | 8 (2.3%)                                                | 7 (8.6%)       | 15 (3.5%)          | .005    |
| Forgot [S]                                                                | 53 (15.1%)                                              | 25 (30.9%)     | 78 (18.1%)         | .001    |
| I did not get an appointment [S]                                          | 25 (7.1%)                                               | 5 (6.2%)       | 30 (6.9%)          | .762    |
| I received professional / informal advice against getting the vaccine [K] | 16 (4.6%)                                               | 3 (3.7%)       | 19 (4.4%)          | 1.000   |
| Concerns about past/recent publicity of vaccines [K]                      | 20 (5.7%)                                               | 3 (3.7%)       | 23 (5.3%)          | .592    |
| Concerns about adverse effects [K]                                        | 47 (13.4%)                                              | 7 (8.6%)       | 54 (12.5%)         | .350    |
| Inconvenient [S]                                                          | 58 (16.5%)                                              | 20 (24.7%)     | 78 (18.1%)         | .085    |
| Do not know where to get it [S]                                           | 52 (14.8%)                                              | 9 (11.1%)      | 61 (14.1%)         | .388    |
| Cost [S]                                                                  | 56 (16.0%)                                              | 9 (11.1%)      | 65 (15.0%)         | .272    |
| Low risk or low impact of getting ill [K]                                 | 95 (27.1%)                                              | 15 (18.5%)     | 110 (25.6%)        | .111    |
| Influenza vaccine is not effective [K]                                    | 17 (4.8%)                                               | 0              | 17 (3.9%)          | N/A     |
| Other                                                                     | 30 (8.5%)                                               | 6 (7.4%)       | 36 (8.3%)          | .738    |

<sup>a</sup> Data is number of participant. Participants can select more than one reason.<sup>b</sup> [S] refers to system-related factor and [K] refers to knowledge/belief-related factor.
